# Supplementary material
Source: PubMed Central journal article supplement (PMC8720224)
Supplement: NIHMS1762453-supplement-Figure_S1.pdf [file NIHMS1762453-supplement-Figure_S1.pdf]

Prevalence odds ratio (OR) per 10-dBA increment in noise level

Difference in baseline cognitive score per 10-dBA increment in noise level

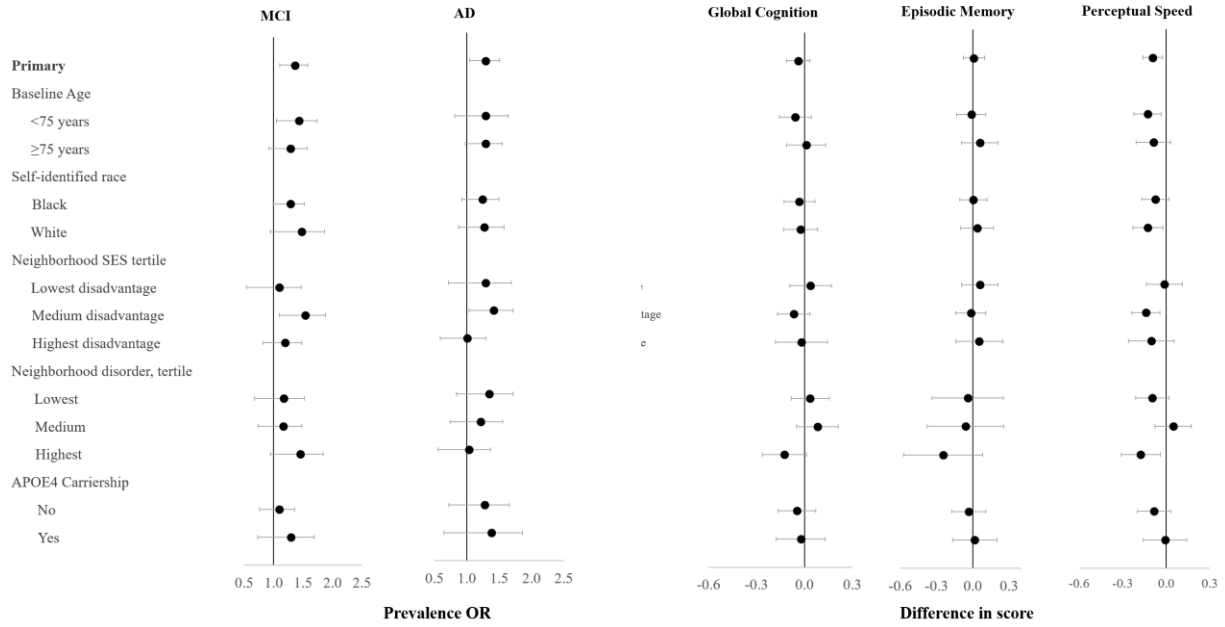

Adjusted for calendar time, baseline age, age at exam, sex, race, income, education, neighborhood SES, smoking, alcohol use, and air pollution (NO<sub>x</sub>). Rate of change stratified by age at time of examination.  
 dBA = A-weighted decibels; NO<sub>x</sub> = oxides of nitrogen; SES = socioeconomic status; AD = Alzheimer's disease dementia; MCI = mild cognitive impairment
